# Supplementary material
Source: PubMed Central journal article supplement (PMC3464101)
Supplement: NIHMS403304-supplement-Supplementary.pdf [file NIHMS403304-supplement-Supplementary.pdf]

## **Supplemental information:**

Video legends.

### **Real-time fluorescence and white light endoscopy video 1 and 2**

*In vivo* fluorescence endoscopic videos in peritoneal tumor bearing mice with Av-pHrodo (1) and Av-TAMRA (2) are shown as supplemental videos. The tumors were visualized with both Av-pHrodo and Av-TAMRA 1hr after the injection, however, fluorescence from excess injectate (see in the white light movie in the left window) in the peritoneal cavity was also clearly visualized.

**Supplemental Fig. 1**

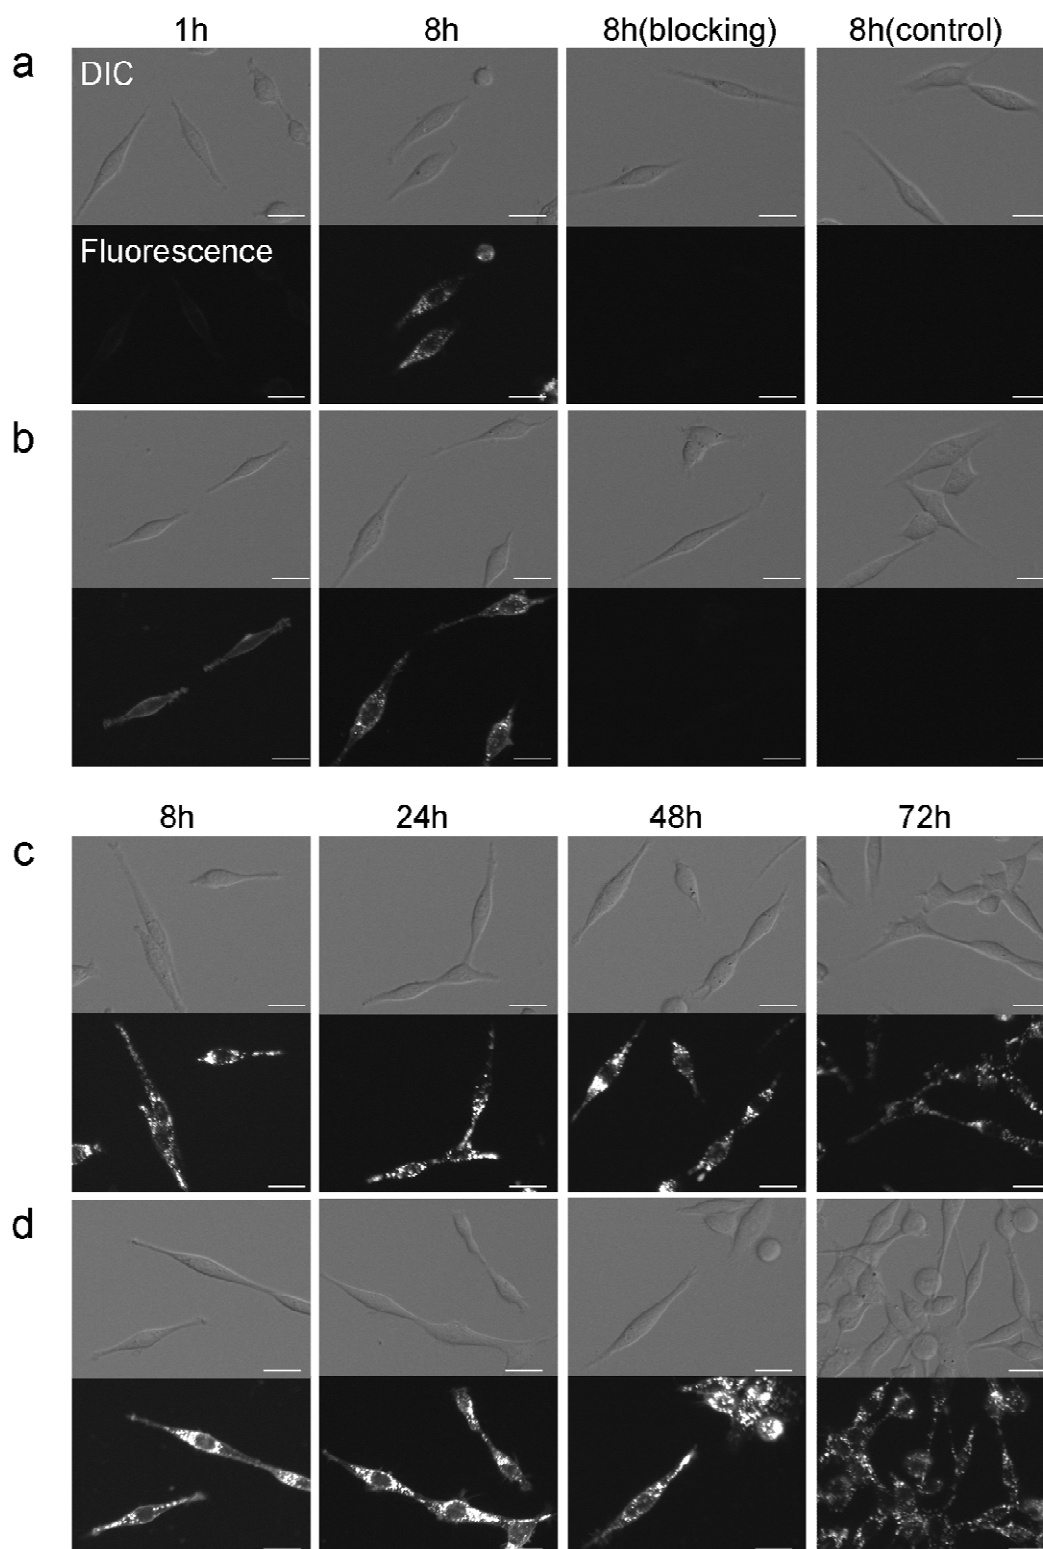

**Supplemental Fig. 1:** 3T3/HER2+ or control (Balb3T3, HER2 negative) cells were incubated with trastuzumab-pHrodo (a) or trastuzumab-TAMRA (b) (10  $\mu\text{g}/\text{mL}$ ). For blocking study, 100  $\mu\text{g}$  trastuzumab was added to the medium. The fluorescence accumulation was blocked with the trastuzumab treatments and no fluorescence was observed in the control cells.

The images were sequentially obtained at 8, 24, 48 and 74 hrs incubation times with trastuzumab-pHrodo (c) or trastuzumab-TAMRA (d) (10  $\mu\text{g}/\text{mL}$ ) in 3T3/HER2+ cells. The intense fluorescence was observed until 48hrs, however, it was decreased after 72hrs incubation. Bars= 20  $\mu\text{m}$ .
